# Supplementary material
Source: publisher site journal article supplement (https://www.dovepress.com/get_supplementary_file.php?f=337469.docx)

FIGURE S1 |NUTF2 expression is correlated with cell growth and apoptosis in HNSC cell.( a) Western blotting analysis of NUTF2 protein expression in the normal human oral keratinocytes (NHOK) and various HNSC cell lines; (b)NUTF2 knockdown was performed in the SCC-25 cell line; the effiffifficiency was verifified by Western blotting; (c) MTT assay was performed to evaluate proliferation in the SCC-25 cell line knockdown of NUTF2 ; (d) Apoptosis assays was performed to evaluate proliferation in the SCC-25 cell line knockdown of NUTF2.


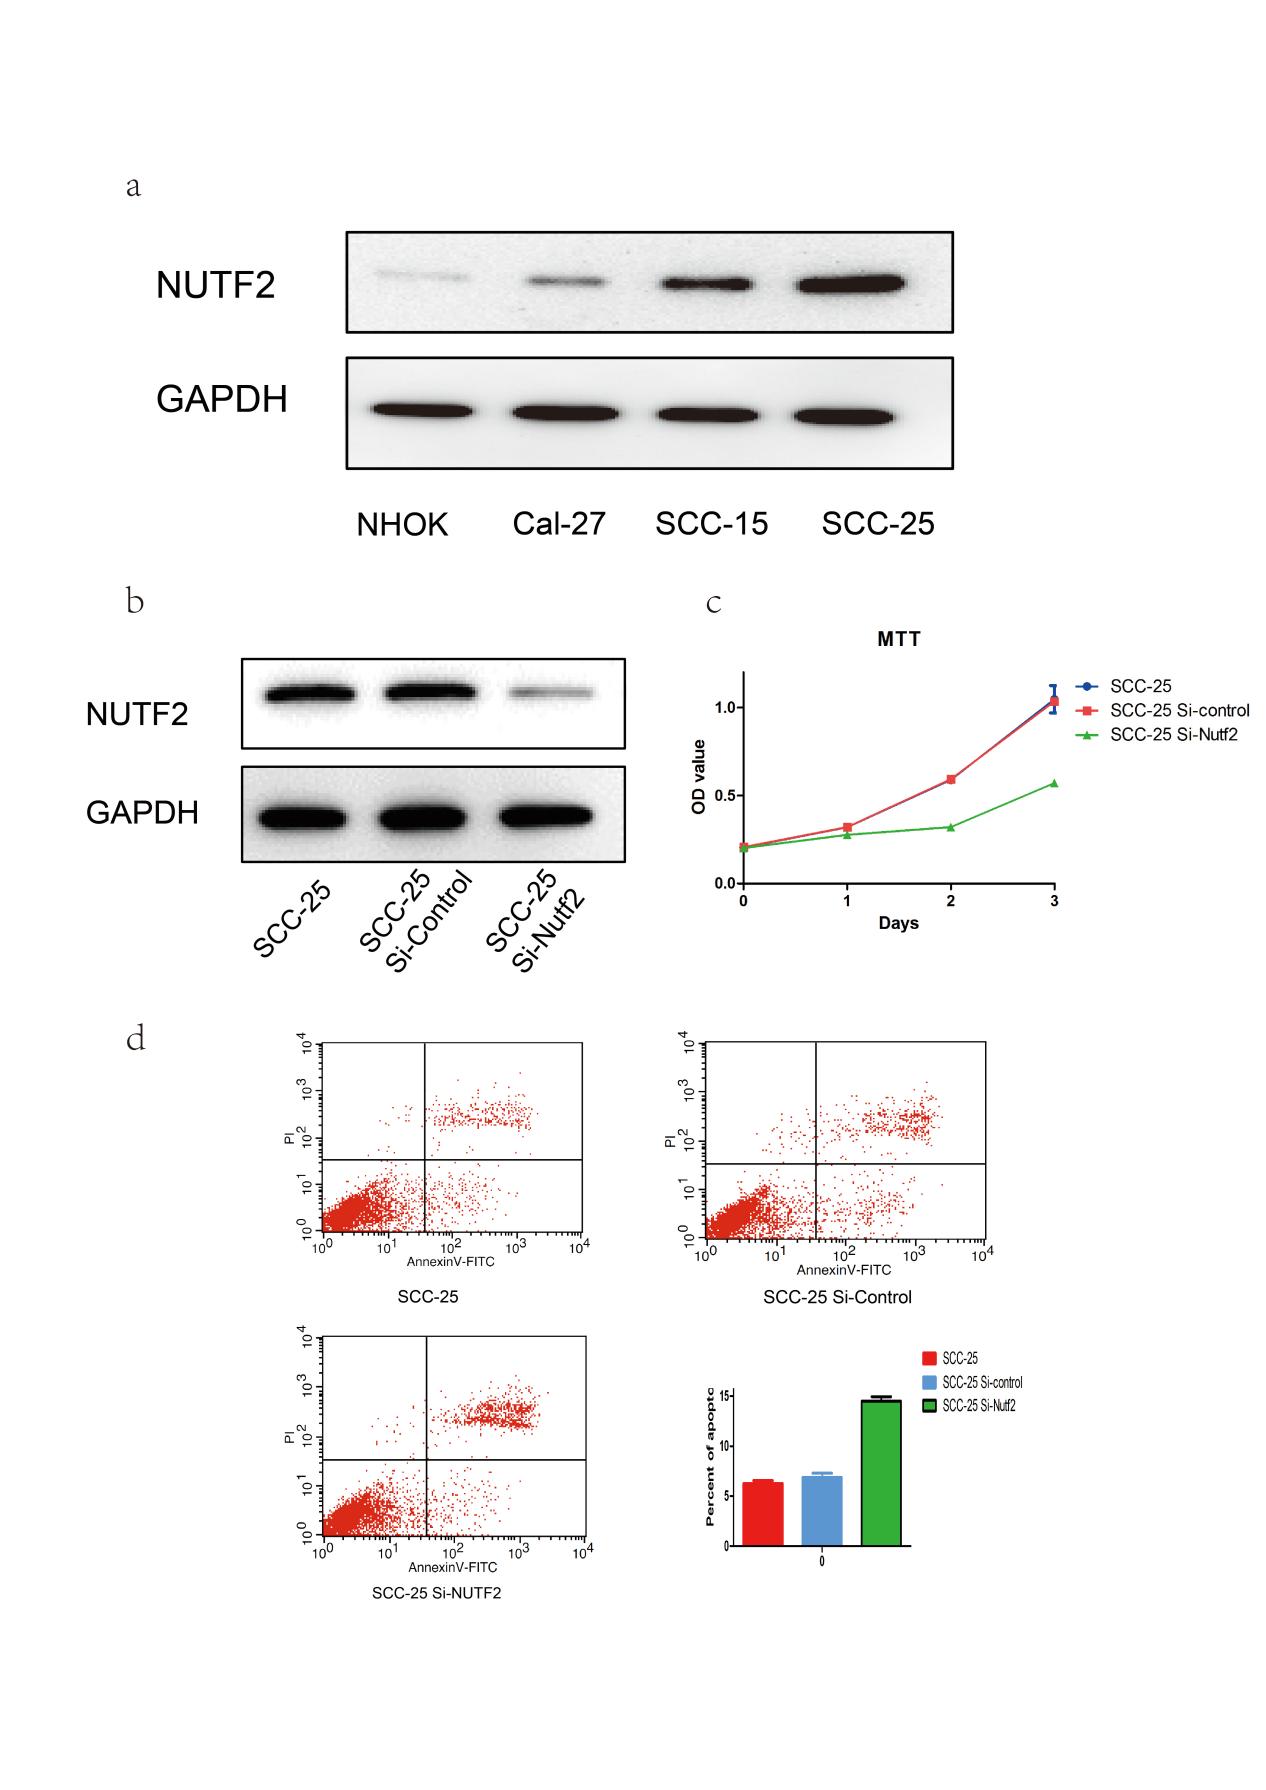

Supplement: Supplementary file 1 [file get_supplementary_file.php]
